# Supplementary material for: Spatial characterization and stratification of colorectal adenomas by Deep Visual Proteomics
Source: bioRxiv or medRxiv preprint supplement (doi:10.1101/2023.11.25.23298987), 2023-11-27
Supplement: Supplementary file [file media-1.pdf]

| Group | Age range | Sex  | Adenoma localization | Recurrence interval | Relapse type   | Tumor type    |
|-------|-----------|------|----------------------|---------------------|----------------|---------------|
| NMA1  | 56-60     | Male | Rectum               | -                   | -              | -             |
| NMA2  | 66-70     | Male | Rectum               | -                   | -              | -             |
| NMA3  | 76-80     | Male | Rectum               | -                   | -              | -             |
| HDA1  | 71-75     | Male | Rectum               | 1 year              | HG adenoma     | Tubulovillous |
| HDA2  | 71-75     | Male | Rectum               | 1 year              | HG adenoma     | Tubulovillous |
| HDA3  | 81-85     | Male | Rectum               | 1 year              | HG adenoma     | Tubulovillous |
| C1    | 61-65     | Male | Rectum               | 1 year              | Adenocarcinoma | Tubulovillous |
| C2    | 81-85     | Male | Rectum               | 1 year              | Adenocarcinoma | Tubulovillous |
| C3    | 76-80     | Male | Colon                | 1 year              | Adenocarcinoma | Tubulovillous |

**Table EV1 Colorectal adenoma subcohort overview.**

**A**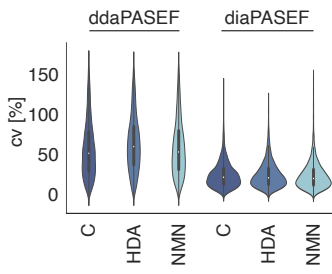**B**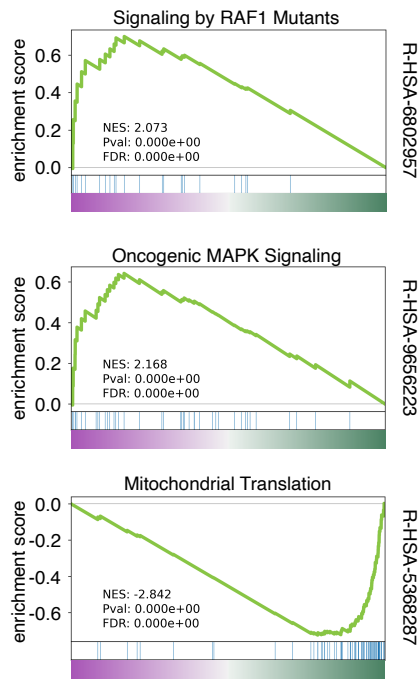**C**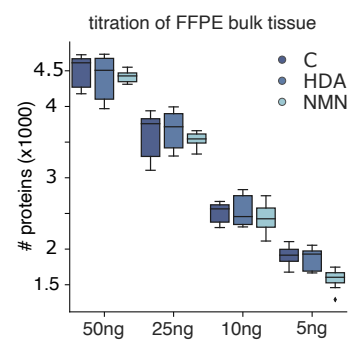**D**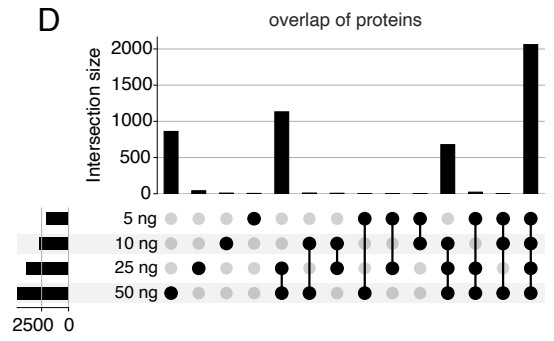

**Figure EV1 Biological and comparative analysis of DIA and DDA acquired data from bulk CRA FFPE samples.**

- A. Gene Set Enrichment Analysis (GSEA) of ddaPASEF acquired data, originating from fractionated bulk FFPE tissue samples.
- B. Number of unique proteins at decreasing FFPE bulk lysate injections (50ng, 25 ng, 10 ng and 5 ng), measured in DIA and quantified by library-based DIA-NN.
- C. Overlap of proteins across different injection amounts.

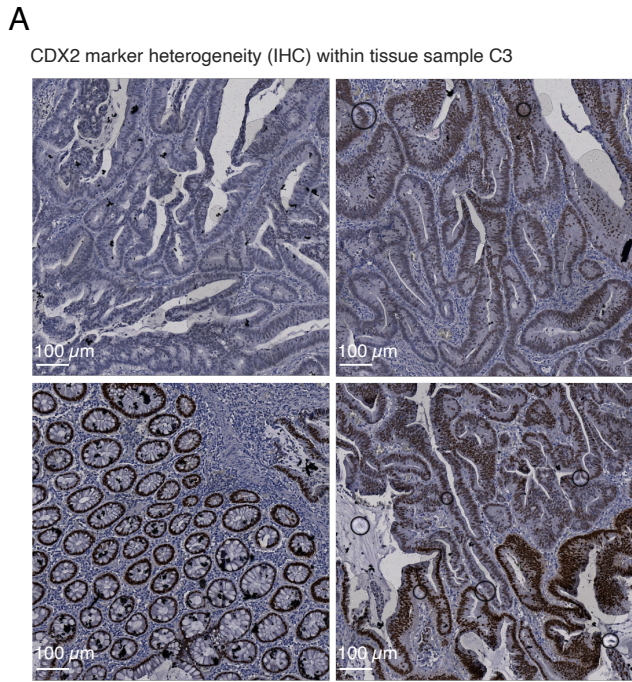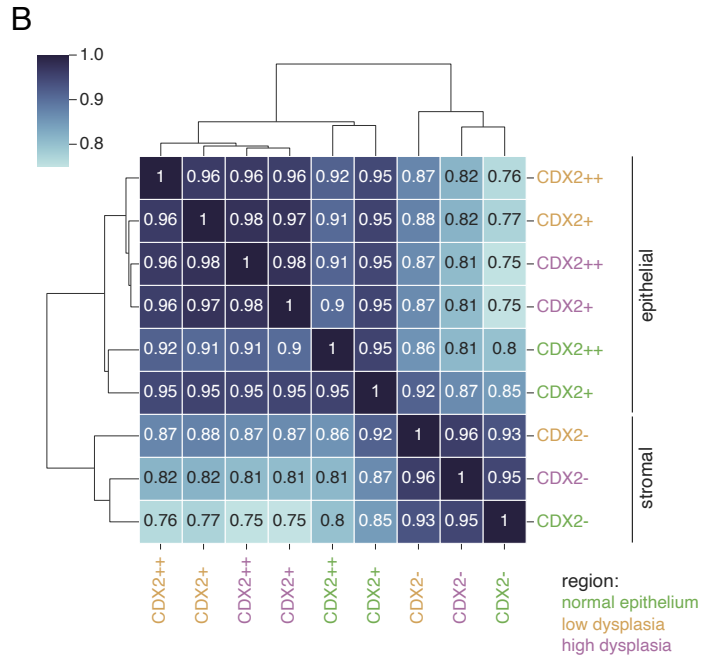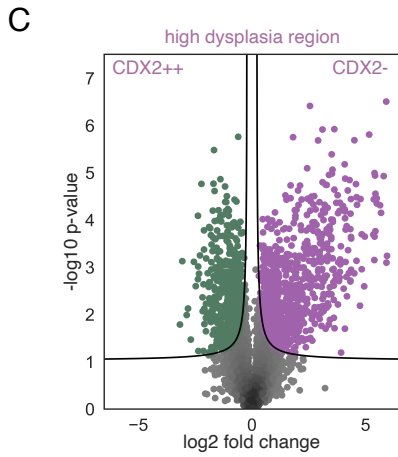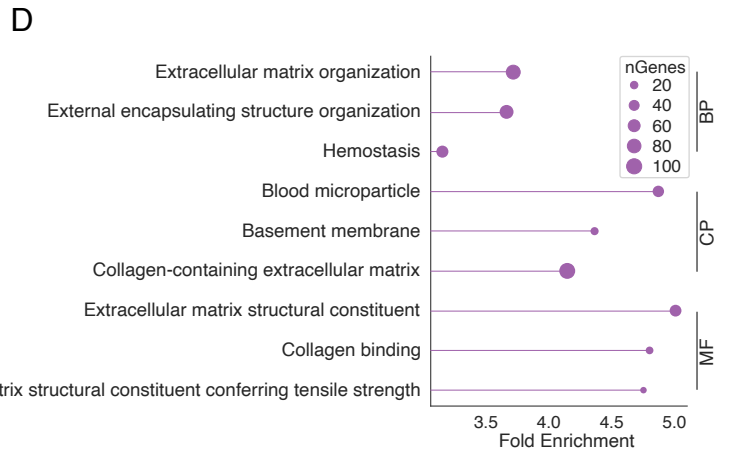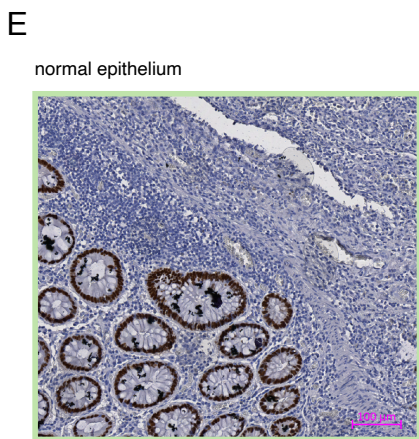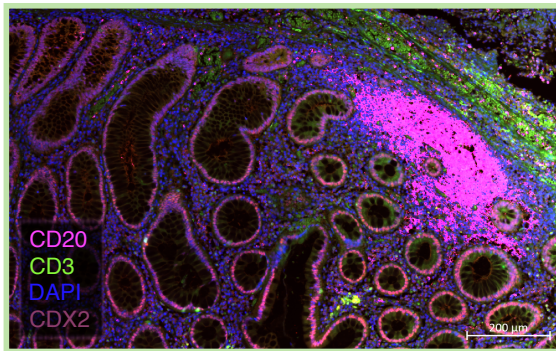

**Figure EV2 Colorectal adenoma heterogeneity.**

- A. IHC staining against the CDX2 marker protein of one particularly heterogenous colorectal adenoma (CRA) tissue (C3). Scale bar, 100  $\mu\text{m}$ .
- B. Correlation matrix of log<sub>2</sub> normalized and imputed intensity values of diaPASEF-acquired low-input DVP samples.
- C. Pairwise proteomic comparison between cell classes CDX2<sup>++</sup> (epithelial) and CDX2<sup>-</sup> (stromal), both laser microdissected from our pre-defined highly dysplastic adenoma region. Significantly enriched proteins are colored and displayed above the black lines (two-sided t-test, permutation-based FDR <0.05,  $s_0 = 0.1$ ).
- D. GO term enrichment (FDR <0.05) of significantly positive protein hits, showing pathways included in 'Biological Process' (BP), 'Cellular Process' (CP), and 'Molecular Function' (MF).
- E. Area showing normal glandular architecture of CRA C3. Left: IHC against CDX2 and hematoxylin counterstaining. Right: Immunofluorescence staining against B lymphocytes (CD20), T lymphocytes (CD4) a nuclear staining (DAPI), and CDX2.

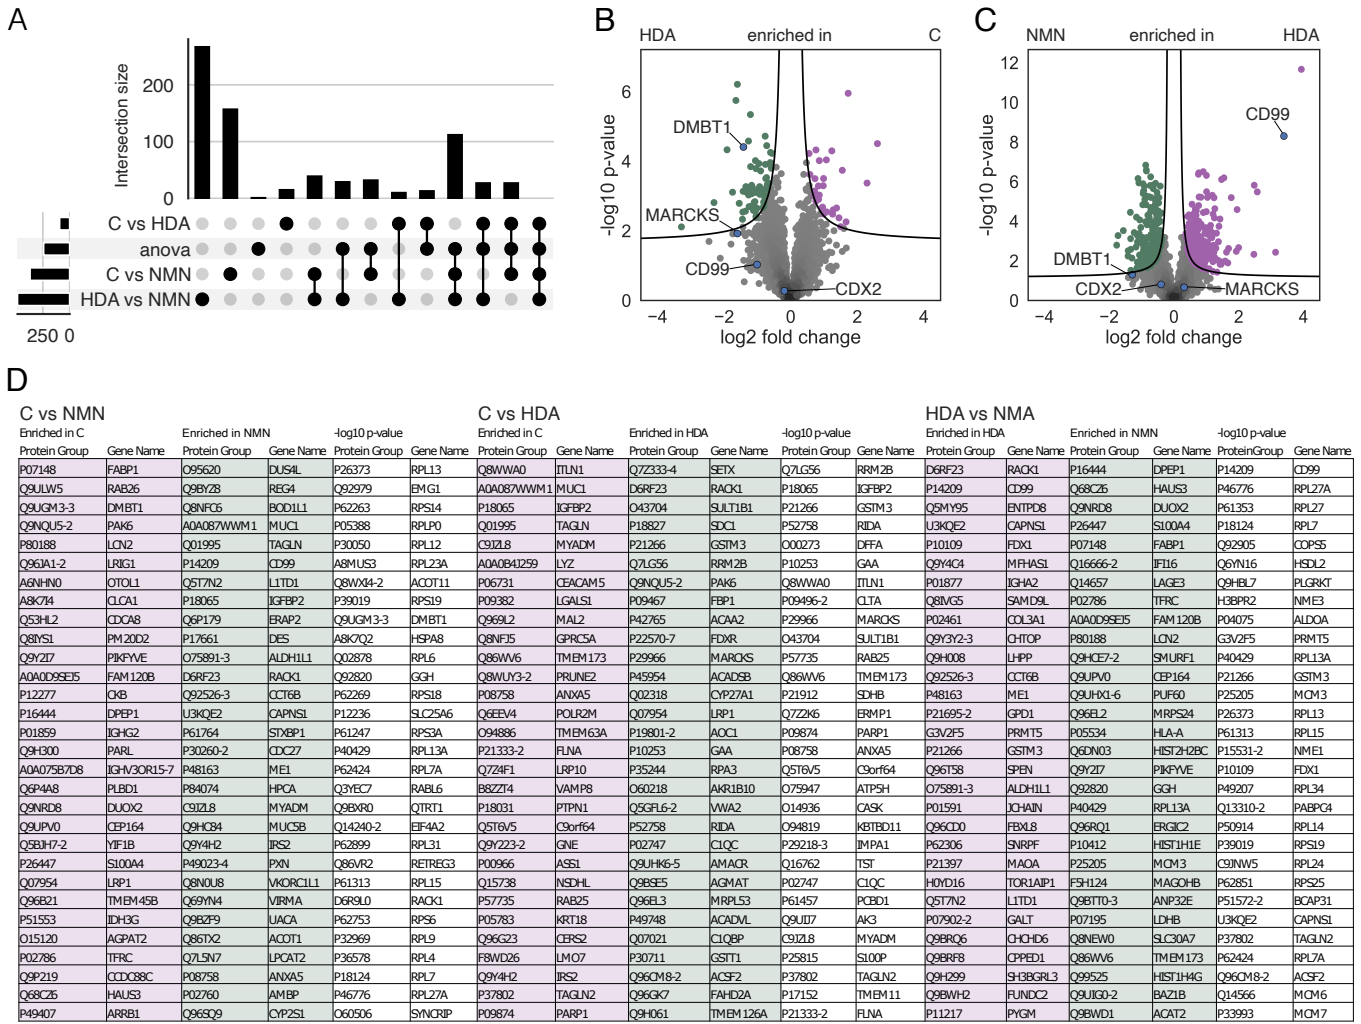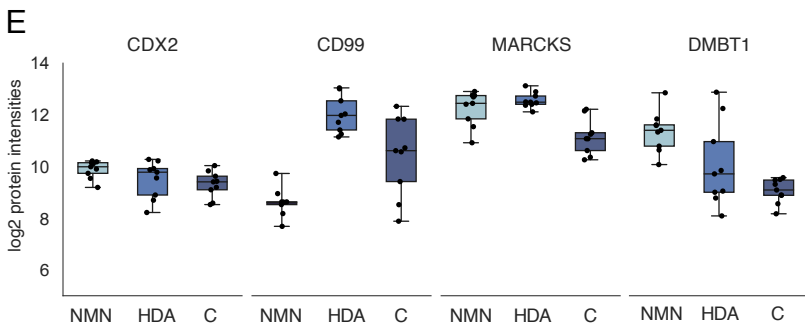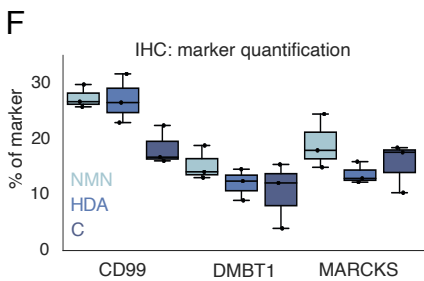

**Figure EV3 Proteomic overview from singly isolated CDX2++ cells from our colorectal adenoma subcohort.**

- A. Overlap of significantly enriched proteins after pairwise proteomic comparison of CDX2++ cells (two-sided t-test, permutation-based FDR <0.01,  $s_0 = 0.1$ ) across CRA tissues.
- B, C. Pairwise proteomic comparison between group HDA and C, and NMN and HDA (two-sided t-test, permutation-based FDR <0.01,  $s_0 = 0.1$ ).
- D. List of significantly enriched proteins between groups C, HDA and NMN after pairwise proteomic comparison (two-sided t-test, permutation-based FDR <0.01,  $s_0 = 0.1$ ). Top 30 significantly enriched proteins are presented in a descending sequence, ordered according to their  $-\log_{10}$  p-value.
- E. Log<sub>2</sub>-transformed LFQ intensities of marker proteins CD99, DMBT1 and MARCKS.
- F. IHC signal quantification of marker proteins CD99, DMBT1 and MARCKS.
